# Supplementary material
Source: ML conference proceedings conference paper supplement (https://openaccess.thecvf.com/content/CVPR2023/html/Chen_gSDF_Geometry-Driven_Signed_CVPR_2023_paper.html)
Supplement: Supplementary file 1 [file Chen_gSDF_Geometry-Driven_Signed_CVPR_2023_supplemental.pdf]

# gSDF: Geometry-Driven Signed Distance Functions for 3D Hand-Object Reconstruction Supplemental Material

Zerui Chen    Shizhe Chen    Cordelia Schmid    Ivan Laptev  
Inria, École normale supérieure, CNRS, PSL Research Univ., 75005 Paris, France  
firstname.lastname@inria.fr

In the supplementary material, we provide more details of our method and additional results. We first present details of our model architecture in Section A. Then in Section B, we provide more details about solving hand poses from predicted 3D joints using inverse kinematics. Finally, we discuss additional experimental results in Section C.

## A. Network Architecture

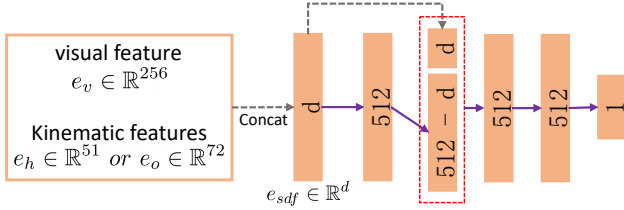

Figure 1. Network architecture used for our hand and object SDF decoders. Following [1, 3], we use five fully-connected layers (marked in purple) for the SDF decoder. The number in the box denotes the dimension of features.

For our SDF decoders (see Figure 2 in the original paper) we adopt the model architecture used in [1, 3] which employ five fully-connected layers as the decoder as illustrated in Figure 1. Given visual feature  $e_v \in \mathbb{R}^{256}$  from the input image (Section 3.2) and kinematic features  $e_h \in \mathbb{R}^{51}$  or  $e_o \in \mathbb{R}^{72}$  from the query point (Section 3.3), we concatenate them together to build a  $d$ -dimensional vector  $e_{sdf}$  and feed it into the SDF decoder.

## B. Hand Kinematics

In this section, we first introduce the forward kinematics and inverse kinematics for the hand as shown in Figure 2(a). Then we present how to use inverse kinematics to calculate hand poses from predicted 3D joints in our method.

**Forward Kinematics.** Forward kinematics is usually defined as the process to compute posed hand joints  $\psi_p \in \mathbb{R}^{21 \times 3}$  from given hand poses (*i.e.*, relative rotations  $\theta \in \mathbb{R}^{16 \times 3}$  and

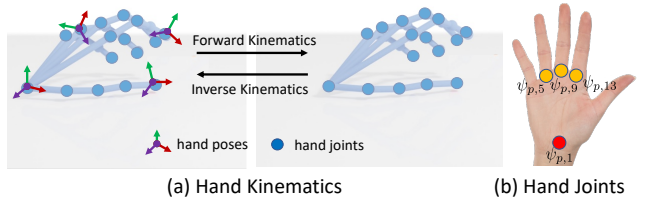

Figure 2. Illustration of hand kinematics. In Figure (a), we show functions of forward kinematics and inverse kinematics. In Figure (b), we show relevant joints (marked in yellow) that are involved in the computation of the hand wrist rotation.

relative translations  $\phi \in \mathbb{R}^{16 \times 3}$ ) and template hand joints  $\psi_t \in \mathbb{R}^{21 \times 3}$ . The  $k_{th}$  joint in  $\psi_p$  can be computed as:

$$\begin{aligned} \psi_{p,k} &= R_k \cdot \phi_k + \psi_{p,pa(k)}, \\ R_k &= R_{pa(k)} \cdot \exp(\theta_k), \end{aligned} \quad (1)$$

where  $R_k$  denotes the global rotation matrix for the  $k_{th}$  joint and  $pa(\cdot)$  returns the parent index of the  $k_{th}$  joint.  $\exp(\cdot)$  denotes *Rodrigues formula* to convert  $\theta_k$  into the form of the rotation matrix. We follow the inverse order of the kinematic chain to derive the global rotation for the  $k_{th}$  joint. For simplicity, we assume that all hands share the same template and set the relative translation as  $\phi_k = \psi_{t,k} - \psi_{t,pa(k)}$ , which simplifies the computation of Equation 1 to:

$$\begin{aligned} \psi_{p,k} &= R_k \cdot (\psi_{t,k} - \psi_{t,pa(k)}) + \psi_{p,pa(k)}, \\ R_k &= R_{pa(k)} \cdot \exp(\theta_k). \end{aligned} \quad (2)$$

**Inverse Kinematics.** Given posed hand joints  $\psi_p$  and template hand joints  $\psi_t$ , inverse kinematics solves relative hand poses ( $\theta, \phi$ ) that defines the transformations from  $\psi_t$  to  $\psi_p$ . As we do in forward kinematics, we also omit  $\phi$  in the computation of inverse kinematics and only solves relative hand rotations  $\theta$ . We first derive the hand wrist rotation matrix  $R_1 \in \mathbb{R}^{3 \times 3}$  from the orientation of three connected joints as shown in Figure 2(b) and formulate it as an optimization

Table 1. Comparison with state-of-the-art methods on ObMan.

| Method                           | C <sub>r</sub> | P <sub>d</sub> | I <sub>v</sub> |
|----------------------------------|----------------|----------------|----------------|
| Hasson <i>et al.</i> [2]         | 94.8%          | 1.20           | 6.25           |
| Karunratanakul <i>et al.</i> [3] | 69.6%          | 0.23           | 0.20           |
| Chen <i>et al.</i> [1]           | 95.5%          | 0.66           | 2.81           |
| gSDF (Ours)                      | 89.8%          | 0.42           | 1.17           |

Table 2. Comparison with state-of-the-art methods on DexYCB.

| Method                           | C <sub>r</sub> | P <sub>d</sub> | I <sub>v</sub> |
|----------------------------------|----------------|----------------|----------------|
| Hasson <i>et al.</i> [2]         | 95.7%          | 1.15           | 9.64           |
| Karunratanakul <i>et al.</i> [3] | 96.0%          | 0.92           | 6.62           |
| Chen <i>et al.</i> [1]           | 96.6%          | 1.08           | 8.40           |
| gSDF (Ours)                      | 95.4%          | 0.94           | 6.55           |

Table 3. Object reconstruction performance with different object kinematic features on DexYCB dataset. \* denotes our implementation of the method proposed in Ye *et al.* [5].

| Model                   | Obj. Pose | CD <sub>o</sub> ↓ | FS <sub>o</sub> @5 ↑ | FS <sub>o</sub> @10 ↑ |
|-------------------------|-----------|-------------------|----------------------|-----------------------|
| R1 Ye <i>et al.</i> [5] | ×         | -                 | 0.420                | 0.630                 |
| R2 Ye <i>et al.</i> *   | ×         | 2.09              | 0.404                | 0.663                 |
| R3 gSDF                 | ×         | 1.78              | 0.411                | 0.676                 |
| R4 (Ours)               | ✓         | <b>1.71</b>       | <b>0.418</b>         | <b>0.689</b>          |

problem:

$$R_1 = \arg \min_{R \in \mathbb{SO}^3} \sum_{i \in \{5,9,13\}} \left\| \psi_{p,i} - R \cdot \psi_{t,i} \right\|_2^2, \quad (3)$$

where we can apply Singular Value Decomposition (SVD) as in [4] to solve this problem. Then, we follow the hand kinematic chain and solve the 3D rotation recursively for each joint. To this end, we rewrite Equation 2 defined in forward kinematics:

$$R_{pa(k)}^{-1}(\psi_{p,k} - \psi_{p,pa(k)}) = \exp(\theta_k)(\psi_{t,k} - \psi_{t,pa(k)}). \quad (4)$$

Then, we could derive the norm and orientation of  $\theta_k$  by computing the dot product and cross product between the vector  $R_{pa(k)}^{-1}(\psi_{p,k} - \psi_{p,pa(k)})$  and the vector  $\psi_{t,k} - \psi_{t,pa(k)}$ , respectively.

## C. Experimental Results

### C.1. Evaluations using additional metrics

To provide a more comprehensive view about our 3D reconstruction performance, we also report Contact Ratio (C<sub>r</sub>), Penetration Depth (P<sub>d</sub>) (cm) and Intersection Volume

Table 4. Comparing computational requirements of different models when reconstructing hand and object meshes of resolution 128 × 128 × 128 from an image on an NVIDIA 1080Ti GPU.

| Method | Input | GPU Memory | Latency |
|--------|-------|------------|---------|
| [3]    | Image | 2357Mb     | 2.87s   |
| [1]    | Image | 2847Mb     | 3.17s   |
| Ours   | Image | 3425Mb     | 3.23s   |
| Ours   | Video | 3764Mb     | 4.14s   |

Table 5. Comparison of our method with AlignSDF [1] on DexYCB while using different numbers of backbones (BB).

| Model    | CD <sub>h</sub> ↓ | FS <sub>h</sub> @1 ↑ | FS <sub>h</sub> @5 ↑ | CD <sub>o</sub> ↓ | FS <sub>o</sub> @5 ↑ | FS <sub>o</sub> @10 ↑ |
|----------|-------------------|----------------------|----------------------|-------------------|----------------------|-----------------------|
| [1]-1BB  | 0.358             | 0.162                | 0.767                | <b>1.83</b>       | 0.410                | 0.679                 |
| Ours-1BB | <b>0.329</b>      | <b>0.166</b>         | <b>0.787</b>         | 1.88              | <b>0.420</b>         | <b>0.689</b>          |
| [1]-2BB  | 0.344             | 0.167                | 0.776                | 1.81              | 0.413                | 0.687                 |
| Ours-2BB | <b>0.310</b>      | <b>0.172</b>         | <b>0.795</b>         | <b>1.71</b>       | <b>0.426</b>         | <b>0.694</b>          |
| Ours-3BB | 0.326             | 0.168                | 0.784                | 1.82              | 0.414                | 0.679                 |

(I<sub>v</sub>) (cm<sup>3</sup>) for our models. We follow the same process as previous works [1, 3] to compute these metrics. As shown in Table 1 and Table 2, we can observe that our approach can generate results with relatively low Penetration Depth (P<sub>d</sub>) and Intersection Volume (I<sub>v</sub>) on both the ObMan and DexYCB benchmarks, which suggests that our model can produce physically plausible 3D reconstruction of hand and object meshes. Table 4 compares the speed and memory of different models. Our image model only slightly increases compute compared to [1, 3].

### C.2. Comparison with Ye *et al.* [5]

As Ye *et al.* [5] is a close work related to ours, we provide more ablation results for comparison with Ye *et al.* [5] in Table 3. The main differences between Ye *et al.* [5] and our work are three-fold. Firstly, they focus on 3D hand-held object reconstruction instead of joint hand-object reconstruction. Secondly, they only consider the hand poses for object reconstruction without object poses, and the hand poses are predicted from an off-the-shelf model. Finally, a larger SDF decoder is used in their work while we follow [1, 3] and use a smaller decoder architecture. Therefore, in Table 3, we only compare the object reconstruction performance. We also re-implement Ye *et al.* [5] (R2 in Table 3) using the same SDF decoder and the same predicted hand poses as ours for a fair comparison. The model in R3 indicates that the joint optimization of hand-object reconstruction is beneficial compared to the model in R2. Our model in R4 uses both hand poses and object poses to produce object kinematic features and achieves the best performance on all the metrics for 3D object reconstruction.

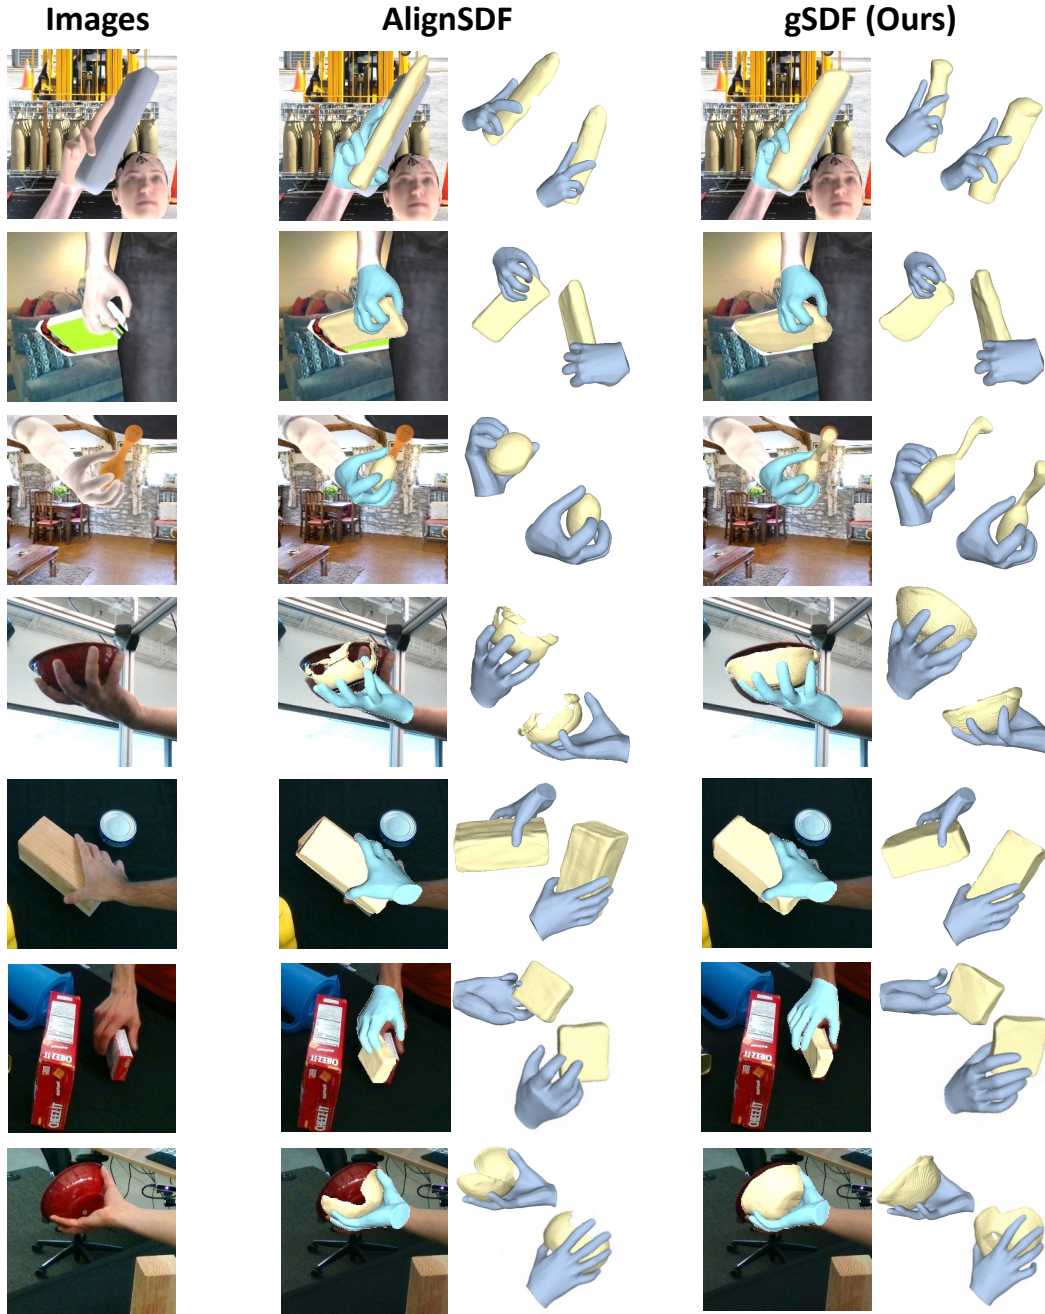

Figure 3. Qualitative comparison between AlignSDF [1] and our gSDF. Our approach can produce more realistic hand and object reconstruction results.

### C.3. Ablations on the number of backbones

Table 5 reports additional results showing improvements of our method over [1] while using the same number of backbones. We note that all models in this table are trained with the local visual features  $V_2$  defined in Table 3. We observe that gSDF can still outperform AlignSDF [1] under a single backbone setting. For a better comparison, we also

extend AlignSDF to two backbones and train it with the two-stage strategy. 2BB results in Table 5 show that our method outperforms [1] even when both methods use two backbones. We further conduct an experiment with three backbones, where we use three separate backbones for hand and object pose estimation and SDF learning. We observe that 3BB consumes more resources without improving performance.



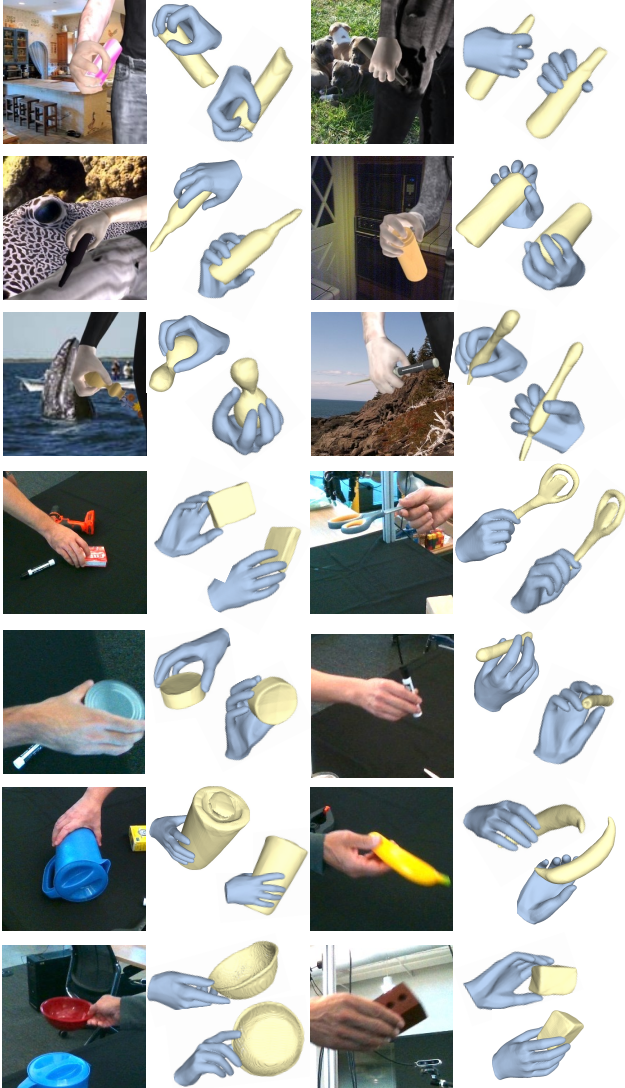

Figure 4. Qualitative results of our model on test images from the ObMan and DexYCB benchmarks. Our approach can produce convincing 3D reconstruction results for different hand grasping poses and challenging objects.

This shows that object pose estimation and SDF learning benefit from a shared backbone in our 2BB asymmetric architecture.

#### C.4. Qualitative results

In this section, we include more qualitative examples in Figure 4 to show that our approach can reconstruct high-quality hand meshes and object meshes for some challenging cases. We also qualitatively compare our method with a most recent work AlignSDF [1] on both the ObMan and DexYCB benchmarks. As shown in Figure 3, we can observe that our method produces more realistic reconstruction results. Even for some objects with thin structures (*e.g.*, bowl), our method

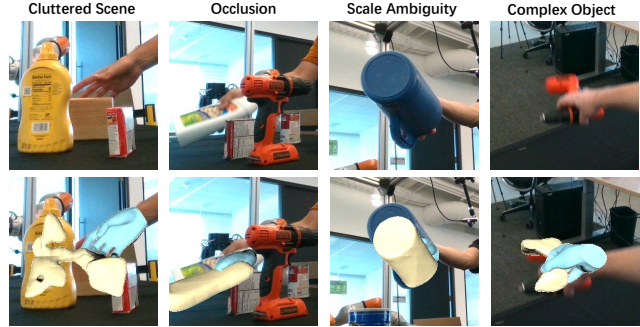

Figure 5. Failure cases analysis of our method on the DexYCB benchmark.

can still faithfully recover their 3D surfaces.

#### C.5. Failure cases analysis

In this section, we analyze some typical patterns for our method on the DexYCB benchmark. As shown in Figure 5, our method sometimes makes unreliable predictions in cluttered scenes. Our method uses a hand-relative coordinate system. Hence, the reconstruction of both hands and objects may fail for scenes with heavily occluded hands. Since our method takes monocular RGB frames as the input, reconstructed objects, especially for big objects, might have incorrect scales. For some objects with complex geometric topology, it is still difficult to produce accurate 3D reconstructions under strong motion blur.

#### References

- [1] Zerui Chen, Yana Hasson, Cordelia Schmid, and Ivan Laptev. AlignSDF: Pose-Aligned signed distance fields for hand-object reconstruction. In *ECCV*, 2022. 1, 2, 3, 4
- [2] Yana Hasson, Gul Varol, Dimitrios Tzionas, Igor Kalevtykh, Michael J Black, Ivan Laptev, and Cordelia Schmid. Learning joint reconstruction of hands and manipulated objects. In *CVPR*, 2019. 2
- [3] Korrawe Karunratanakul, Jinlong Yang, Yan Zhang, Michael J Black, Krikamol Muandet, and Siyu Tang. Grasping Field: Learning implicit representations for human grasps. In *3DV*, 2020. 1, 2
- [4] Jiefeng Li, Chao Xu, Zhicun Chen, Siyuan Bian, Lixin Yang, and Cewu Lu. HybrIK: A hybrid analytical-neural inverse kinematics solution for 3D human pose and shape estimation. In *CVPR*, 2021. 2
- [5] Yufei Ye, Abhinav Gupta, and Shubham Tulsiani. What’s in your hands? 3D reconstruction of generic objects in hands. In *CVPR*, 2022. 2
